# Supplementary material for: Systems Pharmacology Uncovers the Multiple Mechanisms of Xijiao Dihuang Decoction for the Treatment of Viral Hemorrhagic Fever
Source: Evid Based Complement Alternat Med. 2016 Apr 27;2016:9025036. doi: 10.1155/2016/9025036 (PMC4863105; doi:10.1155/2016/9025036)
Supplement: Supplementary file 1 — Table S1: the 136 compounds information of XJDH. Table S2: the relevant biological processes of the candidate targets. [file 9025036.f1.zip]

Archive with 2 entries (2 files):
- Table S1.xlsx
- Table S2.xlsx
