# Supplementary material for: Systems Pharmacology Uncovers the Multiple Mechanisms of Xijiao Dihuang Decoction for the Treatment of Viral Hemorrhagic Fever
Source: Evid Based Complement Alternat Med. 2016 Apr 27;2016:9025036. doi: 10.1155/2016/9025036 (PMC4863105; doi:10.1155/2016/9025036)
Supplement: Supplementary file 1 — Table S1: the 136 compounds information of XJDH. Table S2: the relevant biological processes of the candidate targets. [file 9025036.f1.zip › Table S1.xlsx]

## Sheet: Sheet2
Herb_Name	MOL_ID_NEW	Molecule_Name	OB	CACO2	DL	HL
Buffalo Horn	MOL001	Cholesterol	37.87	1.31062	0.68	Long
Paeonia lactiflora Pall.	MOL002	Paeoniflorigenone	25.9	-0.14119	0.37	Long
Paeonia lactiflora Pall.	MOL003	24-Methylenecycloartanol	10.397	1.41751	0.78773	Short
Paeonia lactiflora Pall.	MOL004	2,2-Dimethylcyclohexanol	82.5411	1.22179	0.022903	Long
Paeonia lactiflora Pall.	MOL005	Dibutylphenol	38.9045	1.73045	0.063535	Long
Paeonia lactiflora Pall.	MOL006	Methyl gallate	30.9079	0.26396	0.051049	Long
Paeonia lactiflora Pall.	MOL007	Oxypaeoniflorin	10.57	-1.87817	0.78	Short
Paeonia lactiflora Pall.	MOL008	Henicosane	8.41291	1.85994	0.15364	Long
Paeonia lactiflora Pall.	MOL009	1,2,3,6-Tetra-O-Galloylglucose	3.01372	-2.97474	0.34047	Long
Paeonia lactiflora Pall.	MOL010	Dodecanal	21.5184	1.39664	0.033475	Short
Paeonia lactiflora Pall.	MOL011	Octadec-9-Ene	19.5002	1.86755	0.091417	Long
Paeonia lactiflora Pall.	MOL012	Propyl (2R)-2-Hydroxypropanoate	25.5006	0.44112	0.013723	Short
Paeonia lactiflora Pall.	MOL013	4-Chlorobutyric Acid	85.8183	0.74379	0.0063724	Short
Paeonia lactiflora Pall.	MOL014	(-)-Alpha-Cedrene	55.561	1.80591	0.10498	Long
Paeonia lactiflora Pall.	MOL015	Astragalin	2.28	-1.27598	0.74	Long
Paeonia lactiflora Pall.	MOL016	Lactiflorin	48.19	-1.27459	0.8	Long
Paeonia lactiflora Pall.	MOL017	Galloylpaeoniflorin	3.03	-1.82719	0.42	Short
Paeonia lactiflora Pall.	MOL018	β-Sitosterol	36.91	1.3402	0.75	Short
Paeonia lactiflora Pall.	MOL019	Benzoyl Paeoniflorin	31.14	-1.21281	0.54	Short
Paeonia lactiflora Pall.	MOL020	(+)-Trans-Myrtanol	49.6649	1.16922	0.058729	Short
Paeonia lactiflora Pall.	MOL021	3,4,5-Trihydroxybenzoic Acid	31.6913	-0.09452	0.044562	Short
Paeonia lactiflora Pall.	MOL022	1-Dodecanol	18.4965	1.23267	0.032811	Short
Paeonia lactiflora Pall.	MOL023	Gallotannin	7.3639	-5.47028	0.03337	Long
Paeonia lactiflora Pall.	MOL024	Oleanolic Acid	29.0208	0.58907	0.75599	Short
Paeonia lactiflora Pall.	MOL025	Dipropyl Phthalate	66.2964	0.77503	0.099613	Long
Paeonia lactiflora Pall.	MOL026	Heptadekan	8.64247	1.81907	0.074658	Long
Paeonia lactiflora Pall.	MOL027	Daucosterol	20.63	-0.30265	0.62	Long
Paeonia lactiflora Pall.	MOL028	Alexandrin	20.6319	-0.28705	0.62437	Long
Paeonia lactiflora Pall.	MOL029	(+)-Catechin	54.8264	-0.03424	0.24164	Short
Paeonia lactiflora Pall.	MOL030	Hederagenol	22.4249	0.10497	0.7433	Short
Paeonia lactiflora Pall.	MOL031	Mairin	55.3771	0.73231	0.7761	Short
Paeonia lactiflora Pall.	MOL032	Bicetyl	8.0348	1.94479	0.46175	Long
Paeonia lactiflora Pall.	MOL033	Stearic Acid	17.8254	1.14557	0.14086	Short
Paeonia lactiflora Pall.	MOL034	Pentagalloylglucose	3.01372	-3.08494	0.20921	Long
Paeonia lactiflora Pall.	MOL035	Albiflorin	20.55	-1.23157	0.77	Short
Paeonia lactiflora Pall.	MOL036	Cedrol	16.2345	1.35496	0.12172	Long
Paeonia lactiflora Pall.	MOL037	Myristic Acid	21.1812	1.07113	0.066784	Short
Paeonia lactiflora Pall.	MOL038	Cis-5-Octen-1-Ol	31.8449	1.15557	0.011198	Short
Paeonia lactiflora Pall.	MOL039	Progallin A	25.6147	0.33421	0.058527	Short
Paeonia lactiflora Pall.	MOL040	Albiflorin R1	21.2912	-1.53152	0.8212	Short
Paeonia lactiflora Pall.	MOL041	Acetic Oxide	45.1336	0.65261	0.008045	Long
Paeonia lactiflora Pall.	MOL042	Pentadecylic Acid	20.1846	1.07931	0.081479	Short
Paeonia lactiflora Pall.	MOL043	Methyl Linolelaidate	41.9344	1.46147	0.16791	Short
Paeonia lactiflora Pall.	MOL044	2-Hexyl-1-Decanol	17.0773	1.28638	0.067056	Short
Paeonia lactiflora Pall.	MOL045	Salicylic Acid	32.127	0.62617	0.027213	Long
Paeonia lactiflora Pall.	MOL046	Paeoniflorin	14.43	-1.38342	0.79	Short
Paeonia lactiflora Pall.	MOL047	Isopaeoniflorin	19.92	-1.44744	0.79	Short
Paeonia lactiflora Pall.	MOL048	9-Methylenefluorene	26.8671	1.99304	0.094202	Long
Paeonia lactiflora Pall.	MOL049	Octacosane	8.14661	1.87591	0.36732	Long
Paeonia suffruticosa Andr.	MOL050	Beta-D-Apiose	118.53	-1.45519	0.031686	Short
Paeonia suffruticosa Andr.	MOL051	Paeonoside	39.04	-0.64298	0.24	Short
Paeonia suffruticosa Andr.	MOL052	6-Hydroxycoumarin	14.69	0.69447	0.05	Long
Paeonia suffruticosa Andr.	MOL053	Apocynin	31.7117	0.73871	0.038981	Long
Paeonia suffruticosa Andr.	MOL007	Oxypaeoniflorin	10.57	-1.87817	0.78	Short
Paeonia suffruticosa Andr.	MOL054	3-Acetyl-4-Hydroxybenzoic Acid	37.5829	-0.04489	0.049764	Long
Paeonia suffruticosa Andr.	MOL055	Hexanoic Acid	73.0752	0.796	0.0090082	Short
Paeonia suffruticosa Andr.	MOL056	Betulin	14.61	0.81829	0.78	Long
Paeonia suffruticosa Andr.	MOL057	4-O-Methylpaeoniflorin	25.7063	-1.26939	0.78399	Short
Paeonia suffruticosa Andr.	MOL058	Paeonollide	5.67	-1.63923	0.64	Long
Paeonia suffruticosa Andr.	MOL059	Apiopaeonoside	16.73	-1.86528	0.64	Short
Paeonia suffruticosa Andr.	MOL060	Kaempferol	69.61	0.14956	0.24	Long
Paeonia suffruticosa Andr.	MOL018	β-Sitosterol	36.91	1.3402	0.75	Short
Paeonia suffruticosa Andr.	MOL019	Benzoyl Paeoniflorin	31.14	-1.21281	0.54	Short
Paeonia suffruticosa Andr.	MOL061	Delta 7-Stigmastenol	25.3221	1.31471	0.74807	Short
Paeonia suffruticosa Andr.	MOL021	3,4,5-Trihydroxybenzoic Acid	31.6913	-0.09452	0.044562	Short
Paeonia suffruticosa Andr.	MOL062	Mudanpioside H	6.77481	-1.62762	0.61486	Long
Paeonia suffruticosa Andr.	MOL024	Oleanolic Acid	29.0208	0.58907	0.75599	Short
Paeonia suffruticosa Andr.	MOL063	Mudanoside A	13.3869	-1.42468	0.28719	Short
Paeonia suffruticosa Andr.	MOL064	Oleanic Acid	8.40868	1.1351	0.76536	Short
Paeonia suffruticosa Andr.	MOL027	Daucosterol	20.63	-0.30265	0.62	Long
Paeonia suffruticosa Andr.	MOL065	6-O-Vanillyoxypaeoniflorin	10.9104	-1.58277	0.53795	Long
Paeonia suffruticosa Andr.	MOL066	Methyl Salicylate	42.55	1.05482	0.032031	Long
Paeonia suffruticosa Andr.	MOL029	(+)-Catechin	54.8264	-0.03424	0.24164	Short
Paeonia suffruticosa Andr.	MOL067	Caffeic Acid	25.7644	0.21466	0.050089	Short
Paeonia suffruticosa Andr.	MOL031	Mairin	55.3771	0.73231	0.7761	Short
Paeonia suffruticosa Andr.	MOL034	Pentagalloylglucose	3.01372	-3.08494	0.20921	Long
Paeonia suffruticosa Andr.	MOL068	Octadecyl (E)-3-(3,4-Dihydroxyphenyl)Prop-2-Enoate	3.17869	0.98049	0.55107	Short
Paeonia suffruticosa Andr.	MOL069	Quercetin	9.46	-0.06428	0.28	Short
Paeonia suffruticosa Andr.	MOL070	Eugenol	44.47	1.35704	0.04	Long
Paeonia suffruticosa Andr.	MOL071	Paeonidanin	24.64	-1.3124	0.78	Long
Paeonia suffruticosa Andr.	MOL072	Paeonol	30.98	0.90721	0.04	Long
Paeonia suffruticosa Andr.	MOL073	5-[[5-(4-Methoxyphenyl)Furan-2-Yl]Methylidene]-1,3-Diazinane-2,4,6-Trione	43.444	0.09037	0.30018	Long
Paeonia suffruticosa Andr.	MOL074	Galloyl-Oxypaeoniflorin	3.2045	-2.1757	0.38642	Short
Paeonia suffruticosa Andr.	MOL075	1-(2,3-Dihydroxy-4-Methoxyphenyl)Ethanone	32.9579	0.81329	0.04963	Long
Paeonia suffruticosa Andr.	MOL076	Benzoyl Oxypaeoniflorin	30.72	-1.44512	0.5	Short
Paeonia suffruticosa Andr.	MOL077	Vanillic Acid	35.4724	0.43417	0.040917	Long
Paeonia suffruticosa Andr.	MOL078	(1R)-(+)-Nopinone	57.8602	1.22658	0.053348	Long
Paeonia suffruticosa Andr.	MOL079	Beta-Sitosterol-Beta-D-Glucoside	19.5785	-0.17391	0.62488	Long
Paeonia suffruticosa Andr.	MOL080	Paeonioflorin	10.2207	-1.68529	0.7872	Short
Paeonia suffruticosa Andr.	MOL046	Paeoniflorin	14.43	-1.38342	0.79	Short
Paeonia suffruticosa Andr.	MOL081	3-Hydroxy-4-Methoxyacetophenone	22.3218	0.84744	0.039074	Short
Paeonia suffruticosa Andr.	MOL082	Oleic Acid	33.1284	1.16896	0.14243	Short
Paeonia suffruticosa Andr.	MOL083	Mudanpinoic Acid A	13.8609	0.60206	0.65134	Short
Rehmannia dride rhizome	MOL084	Methyl (2E,4E)-Hexadeca-2,4-Dienoate	41.5652	1.37264	0.11857	Short
Rehmannia dride rhizome	MOL085	Sucrose	7.17082	-2.89053	0.2273	Short
Rehmannia dride rhizome	MOL086	Rehmannioside B	2.04992	-3.18297	0.88237	Short
Rehmannia dride rhizome	MOL087	Rehmannioside A	3.03	-3.56696	0.87	Short
Rehmannia dride rhizome	MOL088	Forsythiaside	3.04859	-1.92003	0.60708	Short
Rehmannia dride rhizome	MOL089	Acteoside	2.94139	-1.89065	0.62449	Short
Rehmannia dride rhizome	MOL090	Purpureaside C	3.14455	-2.7914	0.37671	Short
Rehmannia dride rhizome	MOL091	Echinacoside	3.14455	-2.90875	0.37722	Short
Rehmannia dride rhizome	MOL092	Jionoside B	4.27429	-2.53154	0.3453	Short
Rehmannia dride rhizome	MOL093	Cistanoside A	3.3995	-2.71938	0.33133	Short
Rehmannia dride rhizome	MOL094	Ajugoside	12.15	-1.02767	0.45	Short
Rehmannia dride rhizome	MOL095	6-O-Vanilloylajugol	23.4353	-1.26037	0.83925	Short
Rehmannia dride rhizome	MOL096	Stigmasterol	43.8299	1.44458	0.75665	Short
Rehmannia dride rhizome	MOL097	Acetylcatalpol	5.53316	-1.5676	0.58478	Short
Rehmannia dride rhizome	MOL098	Geniposide	18.7	-1.6789	0.44	Short
Rehmannia dride rhizome	MOL099	Cistanoside F	4.7431	-2.11369	0.68759	Short
Rehmannia dride rhizome	MOL100	Rehmaglutin B	64.6175	-0.5526	0.11221	Long
Rehmannia dride rhizome	MOL101	Methyl Palmitoleate	34.6123	1.38487	0.1172	Short
Rehmannia dride rhizome	MOL102	Aeginetic Acid	48.3148	0.13024	0.12732	Short
Rehmannia dride rhizome	MOL103	8-Epi-Loganic Acid	4.43355	-1.7809	0.40058	Short
Rehmannia dride rhizome	MOL104	Rehmannioside D	4.77	-4.93046	0.59	Short
Rehmannia dride rhizome	MOL105	Glutinoside	21.327	-2.34531	0.5181	Short
Rehmannia dride rhizome	MOL106	Succinic Acid	29.6203	-0.44496	0.012082	Short
Rehmannia dride rhizome	MOL107	Daturic Acid	18.5106	1.12433	0.11827	Short
Rehmannia dride rhizome	MOL018	β-Sitosterol	36.91	1.3402	0.75	Short
Rehmannia dride rhizome	MOL108	Catalpol	14.78	-2.10401	0.44	Short
Rehmannia dride rhizome	MOL109	Jioglutolide	86.9461	-0.15398	0.06453	Long
Rehmannia dride rhizome	MOL110	6-O-P-Coumaroylajugol	26.13	-1.51455	0.84811	Short
Rehmannia dride rhizome	MOL111	Methyl 9,10-Methylene-Hexadecanoate	22.9377	1.42764	0.15004	Short
Rehmannia dride rhizome	MOL112	Melittoside	1.86	-3.55151	0.8	Short
Rehmannia dride rhizome	MOL113	Raffinose	11.7913	-3.91006	0.65793	Short
Rehmannia dride rhizome	MOL114	6-O-P-Hydroxybenzoylajugol	4.53176	-1.66368	0.81093	Short
Rehmannia dride rhizome	MOL027	Daucosterol	20.63	-0.30265	0.62	Long
Rehmannia dride rhizome	MOL115	Dihydrocatalpol	3.58067	-2.24206	0.43633	Short
Rehmannia dride rhizome	MOL116	Rehmaglutin D	62.9	-0.3143	0.1	Long
Rehmannia dride rhizome	MOL117	2-(4'-Hydroxyphenyl-ethyl Hexacosanoate	13.116	1.30896	0.53298	Long
Rehmannia dride rhizome	MOL118	Ajugol	16.871	-1.03193	0.32141	Short
Rehmannia dride rhizome	MOL119	Sumiki'S Acid	52.4397	-0.21243	0.025964	Short
Rehmannia dride rhizome	MOL120	Rehmannioside C	10.2336	-2.81325	0.86018	Short
Rehmannia dride rhizome	MOL121	Cerebrosid	13.8108	-2.69117	0.11001	Short
Rehmannia dride rhizome	MOL122	Lauric Acid	23.5879	1.02187	0.043637	Short
Rehmannia dride rhizome	MOL123	Caffeate	54.9705	0.26919	0.050036	Short
Rehmannia dride rhizome	MOL124	Dihydro-Beta-Ionone	26.25	1.35165	0.05362	Short
Rehmannia dride rhizome	MOL125	Jioglutoside A	3.92027	-1.81928	0.39455	Short
Rehmannia dride rhizome	MOL126	Rehmaglutin A	29.6975	-0.82084	0.098944	Short
Rehmannia dride rhizome	MOL127	Aucubin	3.81	-2.30102	0.33	Short
Rehmannia dride rhizome	MOL128	Jiofuran	54.9136	-0.38403	0.060106	Short
Rehmannia dride rhizome	MOL129	Zoomaric Acid	35.7759	1.17781	0.099334	Short
Rehmannia dride rhizome	MOL130	Jionoside A	3.62335	-2.91789	0.36126	Short
Rehmannia dride rhizome	MOL131	Docosanoate	15.6884	1.21002	0.26054	Short
Rehmannia dride rhizome	MOL132	Stachyose	3.25145	-5.53721	0.5893	Short
Rehmannia dride rhizome	MOL133	Rehmaionoside C	12.8887	-1.18077	0.33601	Short
Rehmannia dride rhizome	MOL134	Leonuride	16.78	-1.7861	0.33	Short
Rehmannia dride rhizome	MOL135	Arachic Acid	16.6564	1.17971	0.19499	Short
Rehmannia dride rhizome	MOL042	Pentadecylic Acid	20.1846	1.07931	0.081479	Short
Rehmannia dride rhizome	MOL136	Danmelittoside	2.78	-2.75534	0.37	Short
