# Supplementary material for: Systems Pharmacology Uncovers the Multiple Mechanisms of Xijiao Dihuang Decoction for the Treatment of Viral Hemorrhagic Fever
Source: Evid Based Complement Alternat Med. 2016 Apr 27;2016:9025036. doi: 10.1155/2016/9025036 (PMC4863105; doi:10.1155/2016/9025036)
Supplement: Supplementary file 1 — Table S1: the 136 compounds information of XJDH. Table S2: the relevant biological processes of the candidate targets. [file 9025036.f1.zip › Table S2.xlsx]

## Sheet: Sheet1
Function	Groups	Num. of Gene	Group Genes
negative regulation of macrophage derived foam cell differentiation	Group7	14	ADRB2|CALCRL|IKBKB|NFKB1|NFKBIA|NR1H2|PPARG|PTGS2|PTPN1|SMAD3|SPHK1|TNFRSF1A|VCAM1|XDH
nitric oxide biosynthetic process	Group11	33	ABAT|ADRA1A|ADRA1D|ADRA2A|ADRA2C|ADRB1|ADRB2|AKT1|ALOX5|CHEK1|CPB2|CYP1B1|DRD1|ESR1|F2|FLT3|GSK3B|HSP90AA1|HTR2A|IKBKB|KLF5|MAOB|NFKB1|NFKBIA|NOS1|NOS2|NOS3|NR1H2|PPARG|PTGS1|PTGS2|SCN5A|TNFRSF1A
response to temperature stimulus	Group13	16	ABAT|ADRB1|ADRB2|AKT1|CPB2|DRD1|GSK3B|HSP90AA1|HTR2A|NFKBIA|NOS1|NOS3|NR1H2|PPARG|PTGS2|SPHK1
regulation of vasodilation	Group19	20	ADRA1A|ADRA1D|ADRA2A|ADRB1|ADRB2|AKT1|CALCRL|CPB2|DRD1|F2|HTR2A|IKBKB|NFKB1|NOS1|NOS2|NOS3|PPARG|SCN5A|SMAD3|TNFRSF1A
drug transmembrane transport	Group30	3	ABCB1|ABCG2|GLB1
regulation of macrophage derived foam cell differentiation	Group33	28	ADCY5|ADRB1|ADRB2|AKR1B1|AKT1|CA2|CALCRL|CYP27B1|ESR1|FLT3|HEXB|HSP90AA1|HTR2A|IKBKB|KLF5|MAPK14|NFKB1|NFKBIA|NOS3|NR1H2|PPARG|PTGS1|PTGS2|PTPN1|SRC|TNFRSF1A|VCAM1|VDR
digestive system process	Group34	36	ACHE|ADRA2A|ADRB2|AKR1B1|AKT1|AR|CA2|CBR1|CHRM1|CHRM3|CYP17A1|CYP1A1|CYP24A1|CYP27B1|DHCR7|ESR1|FLT3|FSHR|G6PD|GLB1|HSD11B2|HSP90AA1|HTR2A|KCNMA1|NFKB1|NOS3|NR0B1|NR1H2|NR3C1|PIK3CG|PPARG|PTGS2|SPHK1|SRC|TNFRSF1A|VDR
body fluid secretion	Group38	15	ADRA2A|AKR1B10|CHRM1|CHRM3|CTRB1|CYP27B1|DHCR7|ENPEP|KCNMA1|NFKB1|NR1H2|NR3C1|PTGS2|VDR|XDH
platelet activation	Group40	17	ADRA2A|ADRA2B|ADRA2C|ADRB2|AKT1|APP|ENPP2|F2|FLT3|HTR2A|MAPK14|NOS3|PIK3CG|PRF1|PTPN1|SRC|TNFRSF1A
negative regulation of inflammatory response	Group41	14	ADRA2A|ADRB2|CALCRL|CDK6|CPB2|CYP27B1|F2|GSK3B|NFKB1|NOS3|PPARG|SMAD3|SRC|TNFRSF1A
regulation of nitric-oxide synthase activity	Group55	17	ADRB2|AKR1B1|AKT1|AR|CA2|ESR1|HSP90AA1|IKBKB|NFKB1|NFKBIA|NOS1|NOS3|NR1H2|PPARG|PTGS2|SCN5A|SRC
regulation of calcium ion transmembrane transport	Group56	14	ADRA2A|ADRA2C|ADRB2|AKT1|ALOX5|CALCRL|CPB2|F2|KCNMA1|NOS1|NR1H2|PIK3CG|PPARG|PTGS2
hormone metabolic process	Group59	15	AKR1B1|CYP17A1|CYP1A1|CYP1B1|CYP27B1|DHCR7|ENPEP|ESR1|FSHR|KCNMA1|NFKB1|NR3C1|REN|UGT2B7|VDR
regulation of tissue remodeling	Group67	25	ADCY5|ADRB2|AHR|AKR1B1|AKT1|AR|CA2|CPB2|CYP27B1|ESR1|ESR2|FSHR|GLO1|HEXB|MAPK14|NOS3|NOX4|NR0B1|NR3C1|POLB|PPARG|PTGS2|REN|SRC|VDR
heat generation	Group78	29	ABAT|ACHE|ADRA1A|ADRA1D|ADRA2A|ADRA2C|ADRB1|ADRB2|AKT1|ALOX5|APP|BCHE|CA2|CHRNA4|DRD1|FLT3|FSHR|GABRA1|HTR2A|KLF5|NISCH|NOS1|NOS3|NR1H2|PPARG|PTGS1|PTGS2|SLC6A2|TNFRSF1A
macrophage derived foam cell differentiation	Group83	12	AKR1B1|AKT1|APP|AR|HEXB|IKBKB|MAPK14|NFKB1|NFKBIA|NR1H2|PPARG|SPHK1
positive regulation of NF-kappaB transcription factor activity	Group87	13	ADRB1|ADRB2|AKR1B1|AR|GSK3B|HSP90AA1|IKBKB|NFKB1|NFKBIA|PPARG|PTGS2|SMAD3|SPHK1
bone remodeling	Group93	9	ADRB2|CA2|CDK6|FSHR|GSK3B|NOX4|PRF1|SMAD3|SRC
adrenergic receptor signaling pathway	Group110	25	ADRA1A|ADRA1D|ADRA2A|ADRA2B|ADRA2C|ADRB1|ADRB2|AKT1|CALCRL|CPB2|DPP4|DRD1|F2|HTR2A|IKBKB|KCNMA1|NOS1|NOS2|NOS3|PIK3CG|PTGS1|PTGS2|SCN5A|SLC6A2|SMAD3
smooth muscle contraction	Group111	29	ADCY5|ADRA1A|ADRA1D|ADRA2A|ADRA2B|ADRA2C|ADRB1|ADRB2|CALCRL|CHRM1|CHRM2|CHRM3|DRD1|ESR1|F2|FSHR|G6PD|HTR2A|KCNMA1|LTB4R2|MAPK14|ME2|NOS1|NOS2|NOS3|PTGS1|PTGS2|RRM2|SPHK1
vascular process in circulatory system	Group113	41	ABAT|ADRA1A|ADRA1D|ADRA2A|ADRA2B|ADRA2C|ADRB1|ADRB2|AKR1B1|AKT1|ALOX5|AOC1|AR|CALCRL|CHRM1|CHRM2|CHRM3|DRD1|ENPEP|FSHR|GAA|GSK3B|HSD11B2|HTR2A|IKBKB|KCNMA1|LTB4R2|MAPK14|MAPT|NISCH|NOS1|NOS2|NOS3|PIK3CG|PPARG|PRF1|PTGS1|PTGS2|REN|SCN5A|SRC
regulation of blood vessel size	Group119	45	ADCY5|ADRA1A|ADRA1D|ADRA2A|ADRA2B|ADRA2C|ADRB1|ADRB2|AKT1|ALOX5|CALCRL|CBR1|CDK6|CHEK1|CHRM2|CHRM3|CHRNA4|CTSC|CYP1A1|DRD1|ESR1|FSHR|GAA|GSK3B|HTR2A|IKBKB|KCNMA1|KLF5|MAPK14|MAPT|NOS1|NOS2|NOS3|NOX4|NR1H2|PIK3CG|POLB|PPARG|PRF1|PTGS1|PTGS2|SCN5A|SPHK1|SRC|TNFRSF1A
response to cold	Group121	25	ADRA2A|ADRB1|ADRB2|AKR1B1|AKT1|ALOX5|CALCRL|F2|FLT3|HEXB|HSP90AA1|HTR2A|IKBKB|KLF5|NFKB1|NFKBIA|NR1H2|PIK3CG|PPARG|PTGS1|PTGS2|PTPN1|SPHK1|TNFRSF1A|VCAM1
regulation of vasoconstriction	Group137	38	ADCY5|ADRA1A|ADRA1D|ADRA2A|ADRA2B|ADRA2C|ADRB1|ADRB2|AKT1|ALOX5|APP|CALCRL|CHRM2|CHRM3|CHRNA4|DRD1|F2|FSHR|HTR2A|KCNMA1|LTB4R2|MAOB|NFKB1|NFKBIA|NISCH|NOS1|NOS3|NR1H2|PIK3CG|PPARG|PTGS1|PTGS2|PTPN1|REN|SCN5A|SLC10A1|SLC6A2|SPHK1
temperature homeostasis	Group141	35	ABAT|ACHE|ADRA1A|ADRA1D|ADRA2A|ADRA2C|ADRB1|ADRB2|AKT1|ALDH2|AOC1|APP|BCHE|CA2|CDK2|CHRNA4|DRD1|F2|FSHR|G6PD|GABRA1|HEXB|HTR2A|KCNMA1|MAOA|MAOB|MAPT|NFKB1|NOS1|NOS3|POLB|PPARG|PRF1|PTGS2|SLC6A2
negative regulation of response to wounding	Group151	13	ADRB1|ADRB2|CALCRL|CDK6|CPB2|CYP27B1|F2|NFKB1|NOS3|NR1H2|PPARG|SMAD3|TNFRSF1A
nitric oxide metabolic process	Group161	23	AKR1B1|AKT1|AR|CA2|CYP1A1|CYP1A2|CYP1B1|CYP27B1|ESR1|F2|HSP90AA1|MAOB|MAPK14|NFKB1|NFKBIA|NOS1|NOS2|NOS3|NOX4|PTGS2|SRC|VDR|XDH
regulation of blood circulation	Group165	36	ABAT|ADCY5|ADRA1A|ADRA1D|ADRA2A|ADRA2B|ADRA2C|ADRB1|ADRB2|AKT1|ALOX5|CALCRL|CHRM1|CHRM2|CHRM3|DRD1|FSHR|G6PD|GAA|GSK3B|HTR2A|KCNMA1|LTB4R2|MAPK14|MAPT|ME2|NOS1|NOS2|NOS3|PIK3CG|PRF1|PTGS1|PTGS2|RRM2|SCN5A|SRC
sensory perception of pain	Group168	21	ADRA1A|ADRA1D|ADRA2A|ADRA2B|ADRA2C|ADRB1|ADRB2|AKT1|ALOX5|CALCRL|CHRNA4|DRD1|HTR2A|IKBKB|KCNMA1|NOS1|NOS2|NOS3|PTGS1|PTGS2|SCN5A
cellular response to steroid hormone stimulus	Group179	43	ADCY5|ADRA2A|ADRA2B|ADRA2C|ADRB2|AHR|AKR1B1|AKT1|APP|AR|CA2|CDK6|CPB2|CYP24A1|CYP27B1|DHCR7|ESR1|ESR2|FSHR|G6PD|HSD11B2|IKBKB|KCNMA1|MAPK14|MAPT|NFKB1|NFKBIA|NOS1|NOS2|NOS3|NR0B1|NR1H2|NR3C1|NR3C2|PIM1|POLB|PPARG|PTGS2|REN|SMAD3|SRC|VDR|XDH
drug metabolic process	Group240	20	ABCC1|ADH1B|AKR1B1|AKR1B10|ALDH2|ALOX5|BCHE|CBR1|CTRB1|CYP1A1|CYP1A2|CYP1B1|CYP2A6|CYP2C9|ELOVL6|MAOB|NOS1|PTGS1|PTGS2|TNFRSF1A
